# Supplementary material for: Porous composite CMC–KCuFC–PEG spheres for efficient cesium removal from wastewater
Source: Royal Society of Chemistry journal article supplement (doi:10.1039/c9nj01697j), 2019-01-01
Supplement: c9nj01697j1.pdf [file c9nj01697j1.pdf]

## Supporting Information

### **Porous composite sphere CMC-KCuFC-PEG for efficient cesium removal from wastewater**

Jiayin Hu,\* Shangqing Chen, Ningluo Zhang, Zheng Wang, Yafei Guo and Tianlong Deng\*

Tianjin Key Laboratory of Marine Resources and Chemistry, College of Chemical Engineering and Materials  
Science, Tianjin University of Science and Technology, Tianjin 300457, PRC;

E-mail address: hujiayin@tust.edu.cn and tldeng@tust.edu.cn

#### **Contents**

|                                               |          |
|-----------------------------------------------|----------|
| <b>1. Characterization.....</b>               | <b>2</b> |
| <b>2. Adsorbent stability.....</b>            | <b>5</b> |
| <b>3. Adsorption isotherm parameters.....</b> | <b>5</b> |

## 1. Characterization

### 1.1 FT-IR spectrum

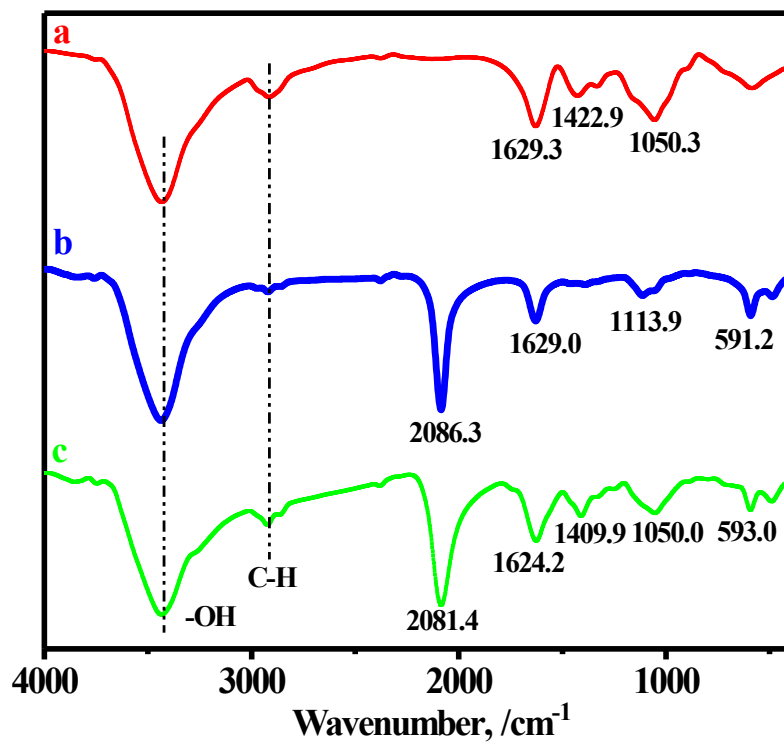

**Figure S1** FT-IR spectra of (a) CMC; (b) KCuFC; (c) CMC-KCuFC-PEG.

### 1.2 XRD pattern

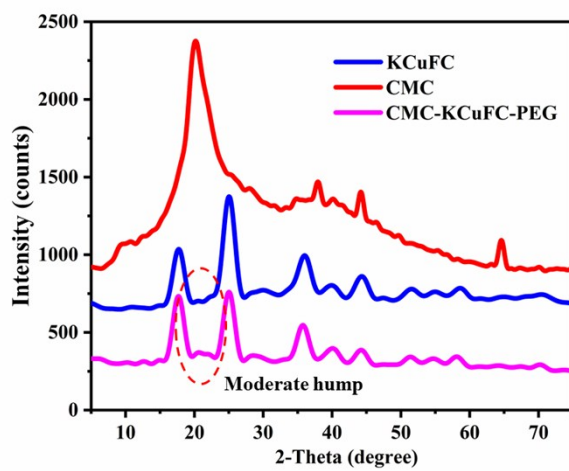

**Figure S2** X-ray diffraction pattern of CMC, KCuFC and CMC-KCuFC-PEG.

1.3 TEM image

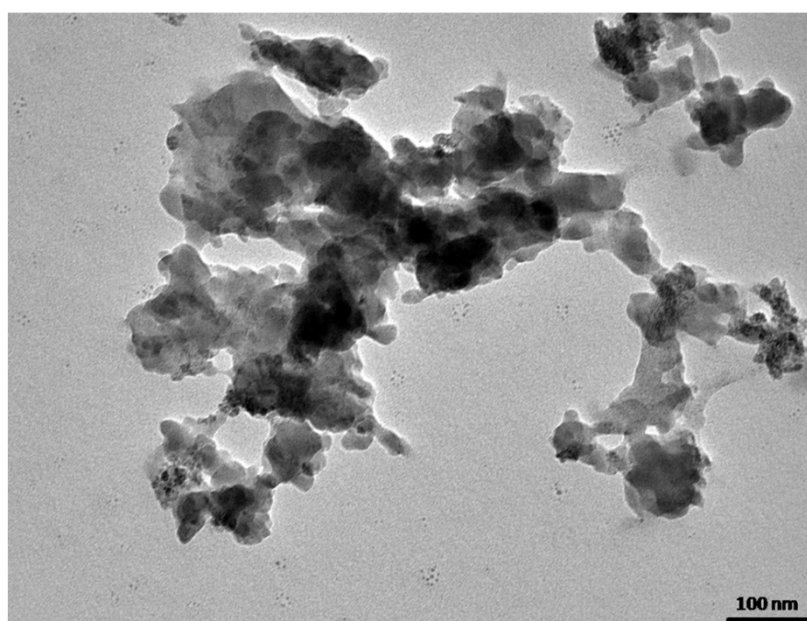

**Figure S3** The TEM image of CMC-KCuFC-PEG.

## 1.4 SEM images

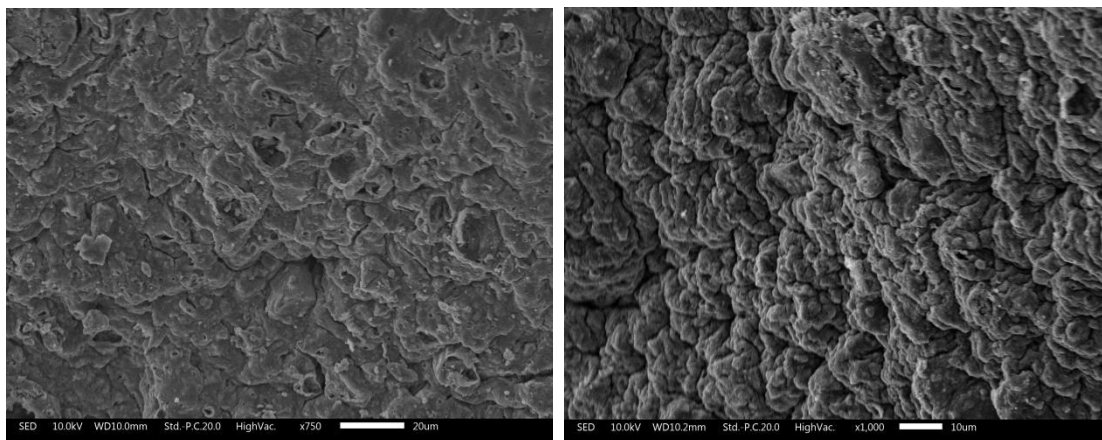

**Figure S4** The more SEM image of CMC-KCuFC-PEG.

## 1.5 N<sub>2</sub> isotherm adsorption

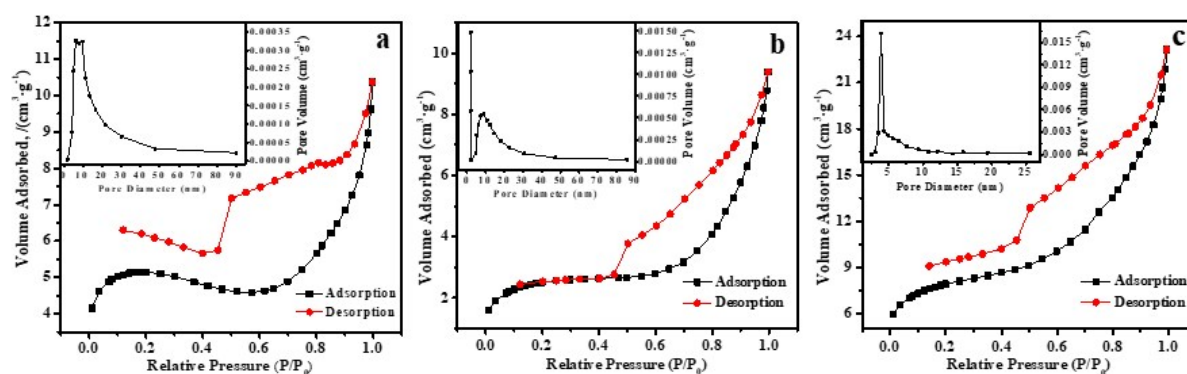

**Figure S5** N<sub>2</sub> adsorption-desorption isotherm of CMC-KCuFC spheres with different porogens. a, without porogen; b, N<sub>2</sub>; c, *n*-hexane.

## 1.6 The comparison of absorption efficiency between Cs<sup>+</sup> and K<sup>+</sup>.

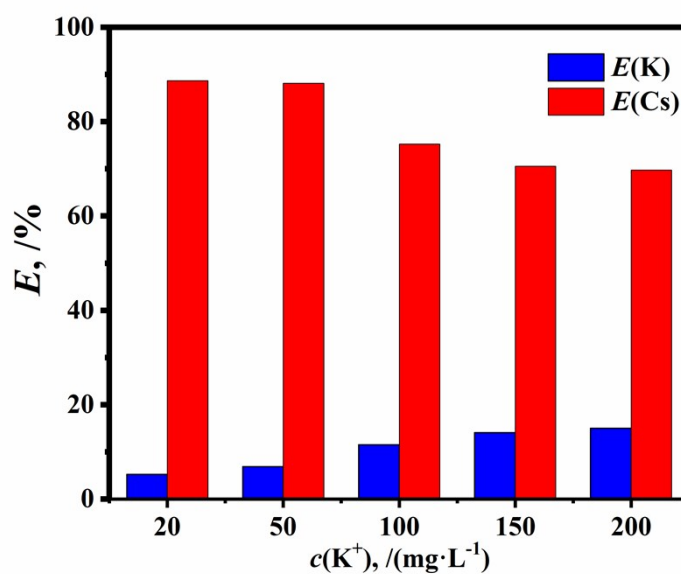

**Figure S6** The comparison of absorption efficiency between Cs<sup>+</sup> and K<sup>+</sup>.

## 2. Adsorption stability

Digital photo of CMC-KCuFC-PEG in  $\text{NH}_4^+$  solution

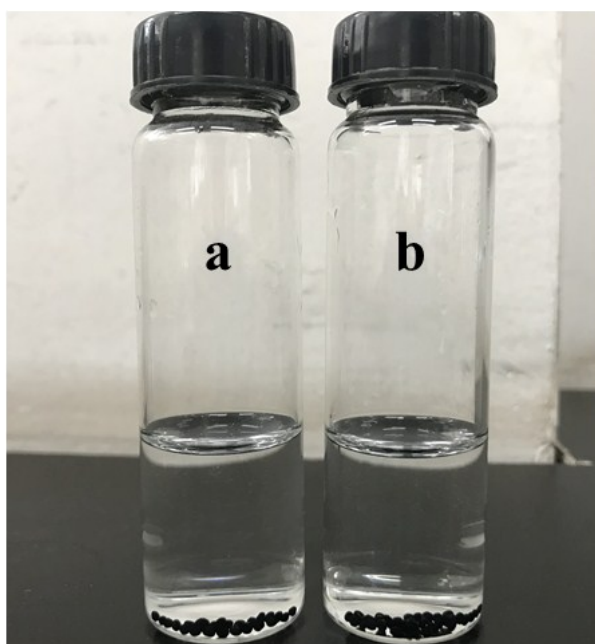

**Figure S7** Digital image of CMC-KCuFC-PEG before (a) and after (b) adsorption process using Cs-containing water with 1 mol/L  $\text{NH}_4^+$  in 10 days.

## 3. Adsorption isotherm parameters

**Table S1** Parameters of Langmuir and Freundlich models for CMC-KCuFC-PEG.

| Adsorbent | $T, /K$ | Langmuir model                 |                                |       | Freundlich model                                   |     |       |
|-----------|---------|--------------------------------|--------------------------------|-------|----------------------------------------------------|-----|-------|
|           |         | $q_m,$<br>$/(mg \cdot g^{-1})$ | $K_L,$<br>$/(L \cdot mg^{-1})$ | $R^2$ | $K_F, /((mg \cdot g^{-1})(L \cdot mg^{-1})^{1/n})$ | $n$ | $R^2$ |

---

|         |        |        |        |       |       |       |       |
|---------|--------|--------|--------|-------|-------|-------|-------|
|         | 293.15 | 127.11 | 0.0311 | 0.856 | 20.04 | 3.060 | 0.976 |
| CMC-    | 303.15 | 126.22 | 0.0540 | 0.944 | 29.07 | 3.710 | 0.987 |
| KCuFC-  | 313.15 | 125.72 | 0.0919 | 0.869 | 38.57 | 4.443 | 0.890 |
| PEG6000 | 323.15 | 149.77 | 0.1036 | 0.849 | 43.74 | 4.126 | 0.915 |

---
